# Supplementary material for: Adaptation to Human Populations Is Revealed by Within-Host Polymorphisms in HIV-1 and Hepatitis C Virus
Source: PubMed Central journal article supplement (PMC1839164; doi:10.1371/journal.ppat.0030045), 2007-03-30
Supplement: ppat.0030045.sd002.pdf [file ppat.0030045.sd002.pdf]

**Protocol S2.** Limit behavior of deterministic model.

To evaluate the limit of equation (3) as  $\tau$  approaches 0, we apply a series expansion at  $\tau=0$  to the unidirectional-mutation approximations to yield:

$$\hat{\pi} \xrightarrow{\tau \rightarrow 0} \left( 1 + \frac{1-q}{q} \frac{\nu}{\mu} \right)^{-1} .$$

The departure of this limit from  $q$  is determined by the ratio  $\nu/\mu$ . The first derivative of  $\hat{\pi}$  with respect to  $\tau$  as  $\tau \rightarrow 0$  is approximated by the formula:

$$\left. \frac{\partial \hat{\pi}}{\partial \tau} \right|_{\tau=0} = \frac{q(1-q)\mu\nu(s_{esc} + \mu - s_{rev} - \nu)}{2(q(\mu - \nu) + \nu)^2} + O(\tau^2) .$$

This quantity is greater than zero when  $s_{esc} + \mu > s_{rev} + \nu$  (*i.e.* when the net effect of selection and mutation is biased towards the escape mutant allele).
