# Supplementary material for: Adaptation to Human Populations Is Revealed by Within-Host Polymorphisms in HIV-1 and Hepatitis C Virus
Source: PubMed Central journal article supplement (PMC1839164; doi:10.1371/journal.ppat.0030045), 2007-03-30

## HIV-1 PR

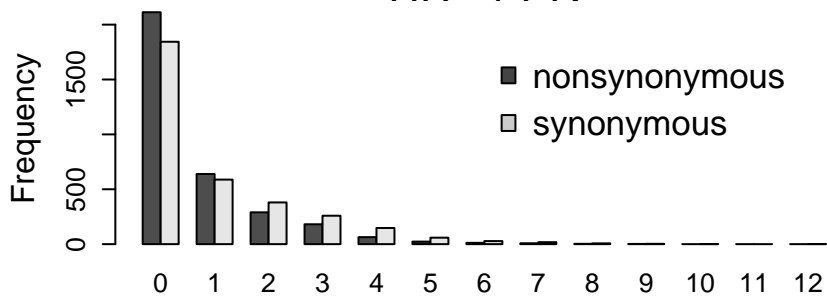

## HIV-1 RT

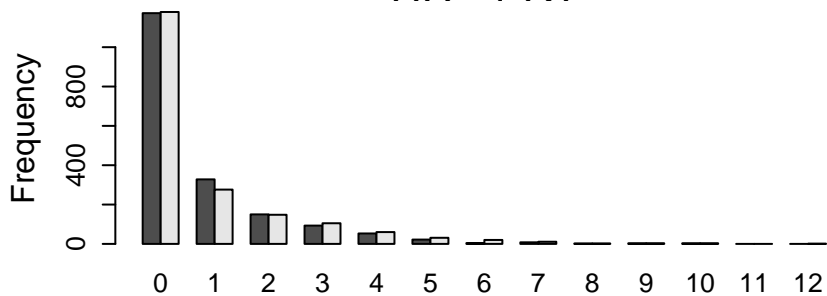

## HCV E1

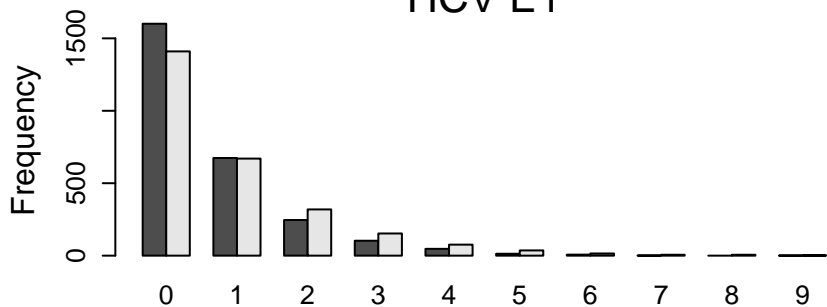

## HCV E2(HVR1)

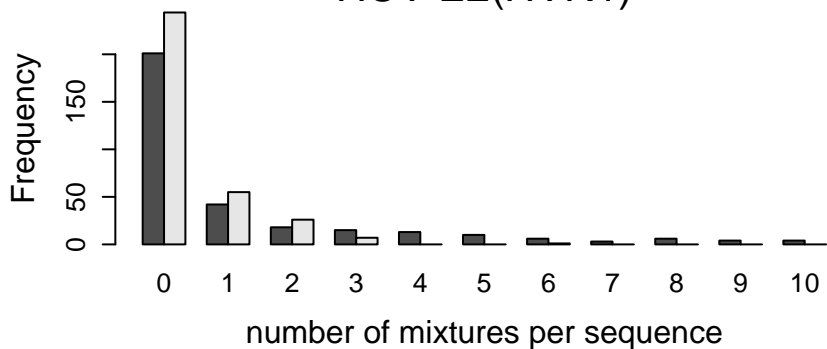

Supplement: ppat.0030045.sg001.pdf [file ppat.0030045.sg001.pdf]
