# Supplementary material for: Adaptation to Human Populations Is Revealed by Within-Host Polymorphisms in HIV-1 and Hepatitis C Virus
Source: PubMed Central journal article supplement (PMC1839164; doi:10.1371/journal.ppat.0030045), 2007-03-30

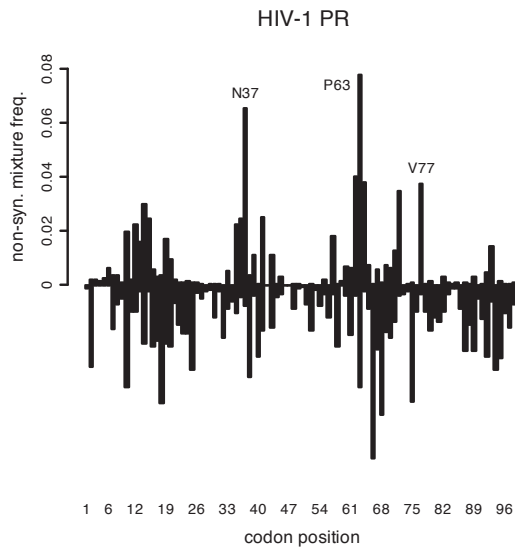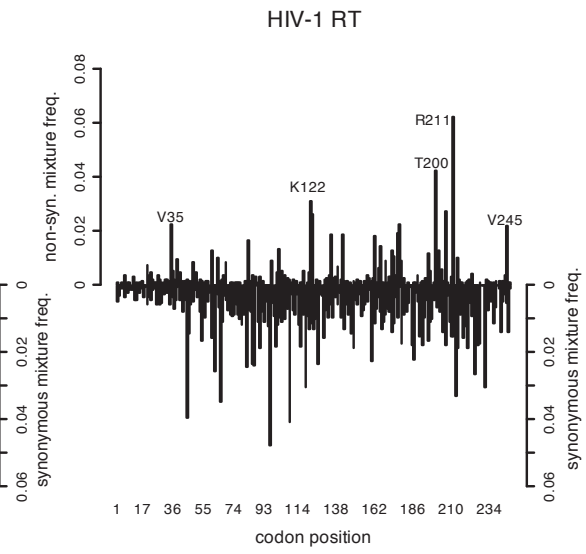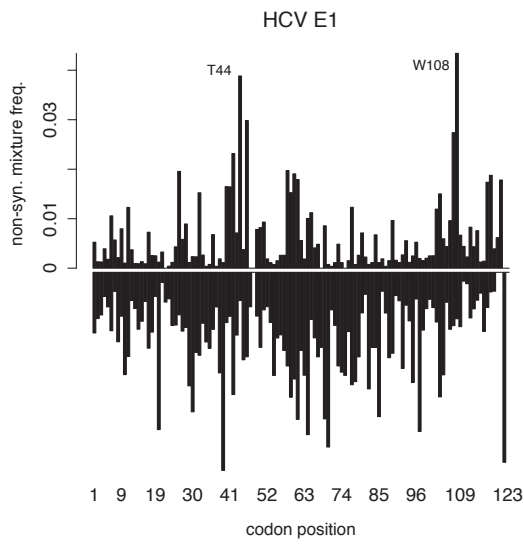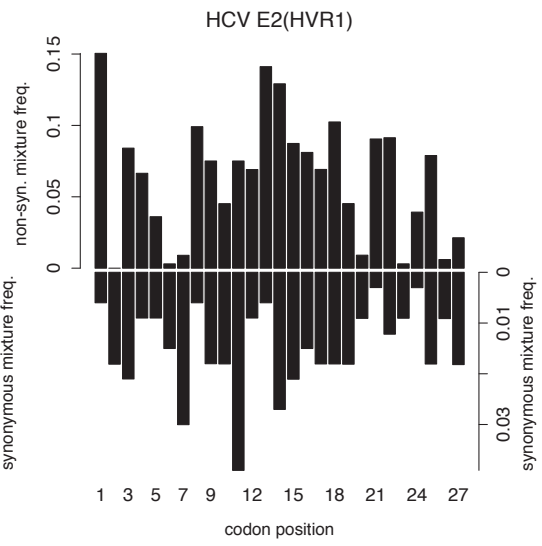

Supplement: ppat.0030045.sg002.pdf [file ppat.0030045.sg002.pdf]
