# Supplementary material for: Adaptation to Human Populations Is Revealed by Within-Host Polymorphisms in HIV-1 and Hepatitis C Virus
Source: PubMed Central journal article supplement (PMC1839164; doi:10.1371/journal.ppat.0030045), 2007-03-30

### HIV-1 PR

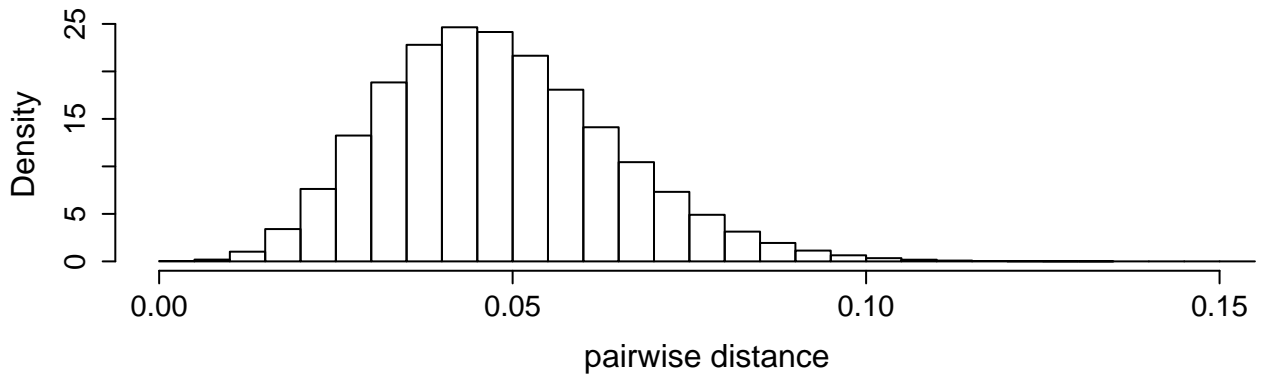

### HIV-1 RT

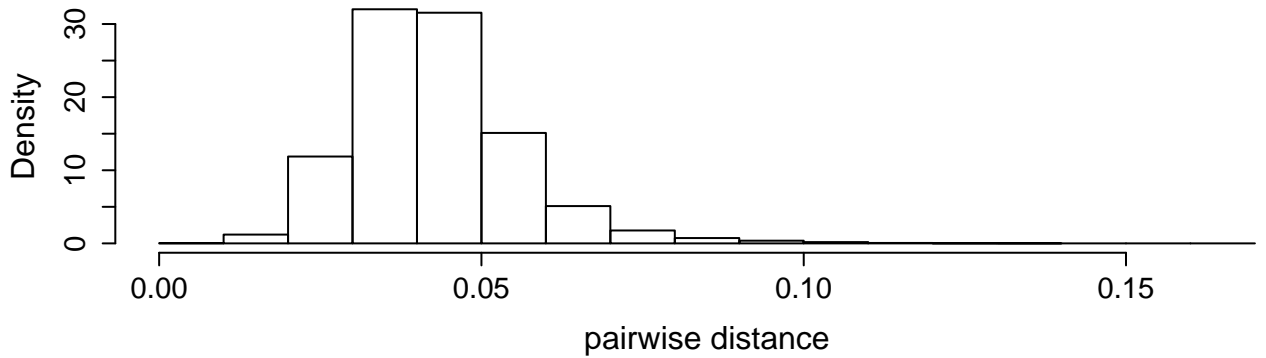

### HCV E1

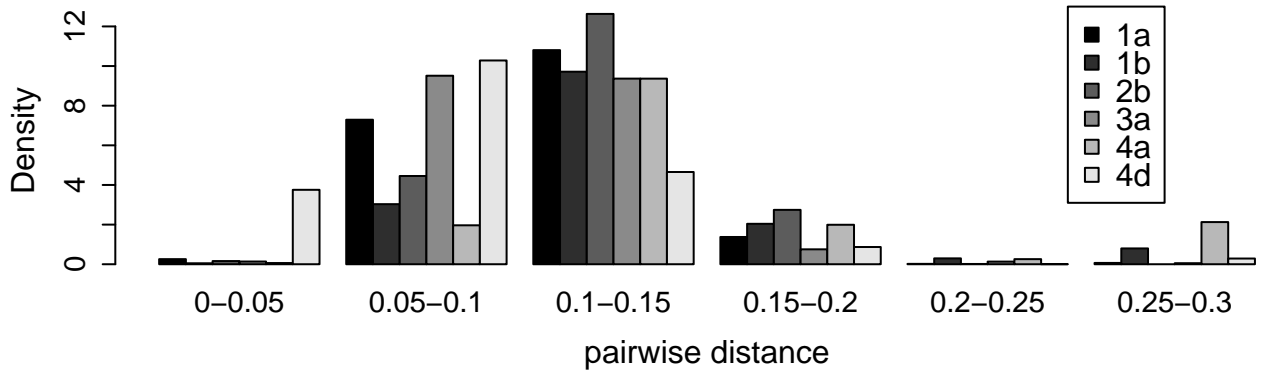

### HCV E2 (HVR1)

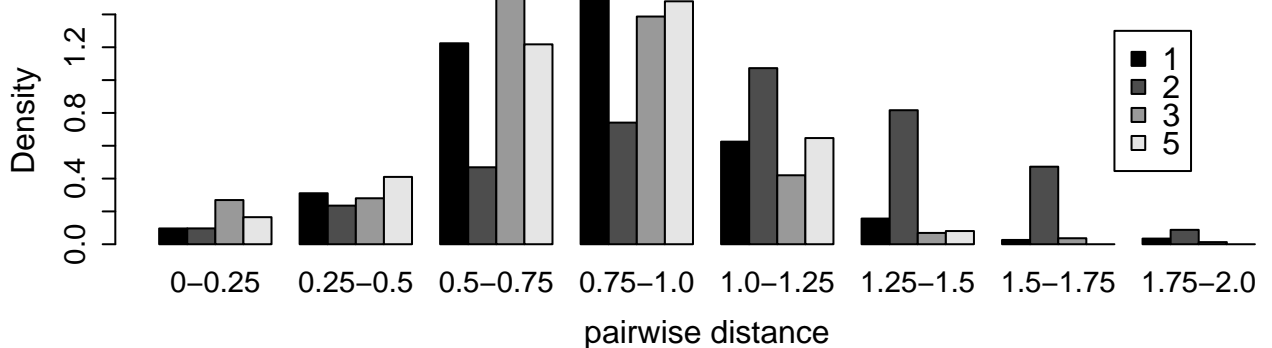

Supplement: ppat.0030045.sg005.pdf [file ppat.0030045.sg005.pdf]
